# Supplementary material for: Neurogenic Myocardial Injury Predicts Increased Mortality and Resource Utilization in Aneurysmal Subarachnoid Hemorrhage
Source: Research Square preprint supplement (doi:10.21203/rs.3.rs-8628679/v1), 2026-02-17
Supplement: Supplementary file 1 [file 4bbeaad0a847efa378f01209.docx]

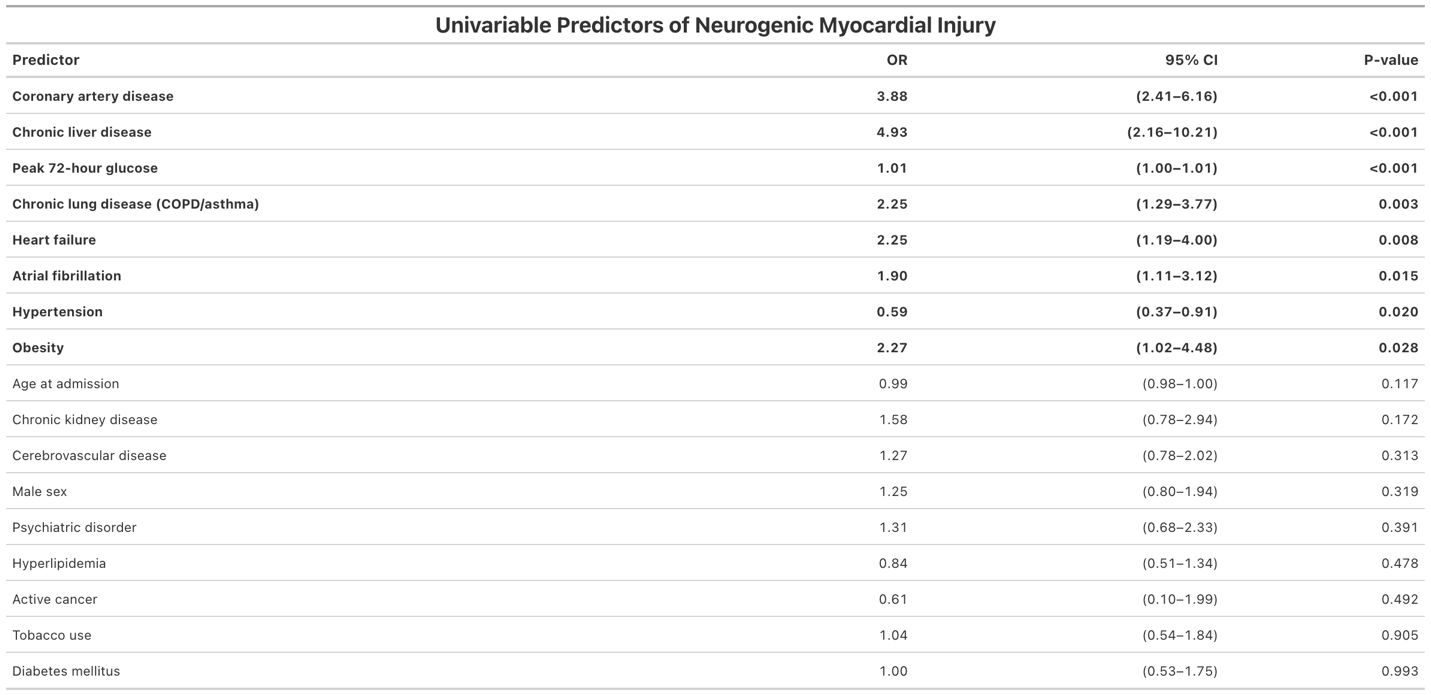


**Table 2.** Univariable Predictors of Neurogenic Myocardial Injury

Odds ratios and 95% confidence intervals from separate univariable logistic regression models for each candidate predictor. Peak 72-hour glucose analysis was restricted to patients with available glucose measurements. Abbreviations: CI, confidence interval; COPD, chronic obstructive pulmonary disease; NMI, neurogenic myocardial injury; OR, odds ratio.
