# Supplementary material for: Neurogenic Myocardial Injury Predicts Increased Mortality and Resource Utilization in Aneurysmal Subarachnoid Hemorrhage
Source: Research Square preprint supplement (doi:10.21203/rs.3.rs-8628679/v1), 2026-02-17
Supplement: Supplementary file 2 [file fbd6bd4710987607fabcc285.docx]

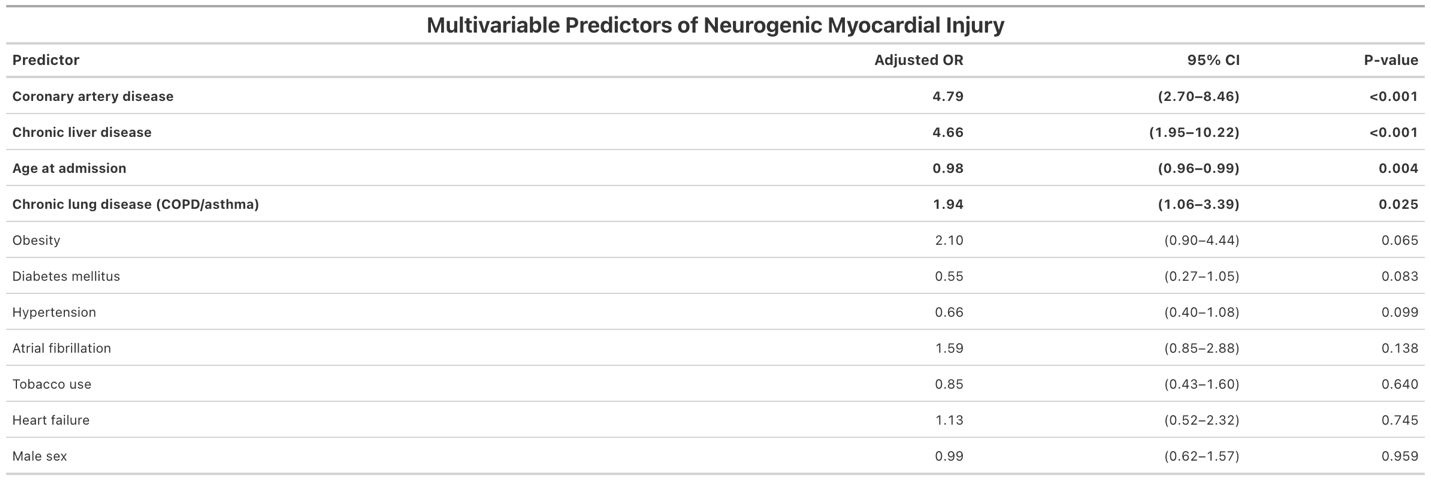


**Table 3.** Multivariable Predictors of Neurogenic Myocardial Injury in the Primary Model

Adjusted odds ratios and 95% confidence intervals from the primary multivariable logistic regression model in the full cohort (N = 1,576).

Abbreviations: CI, confidence interval; COPD, chronic obstructive pulmonary disease; OR, odds ratio.
