# Supplementary material for: Neurogenic Myocardial Injury Predicts Increased Mortality and Resource Utilization in Aneurysmal Subarachnoid Hemorrhage
Source: Research Square preprint supplement (doi:10.21203/rs.3.rs-8628679/v1), 2026-02-17
Supplement: Supplementary file 3 [file ff046a882dc6d34f4edefe65.docx]

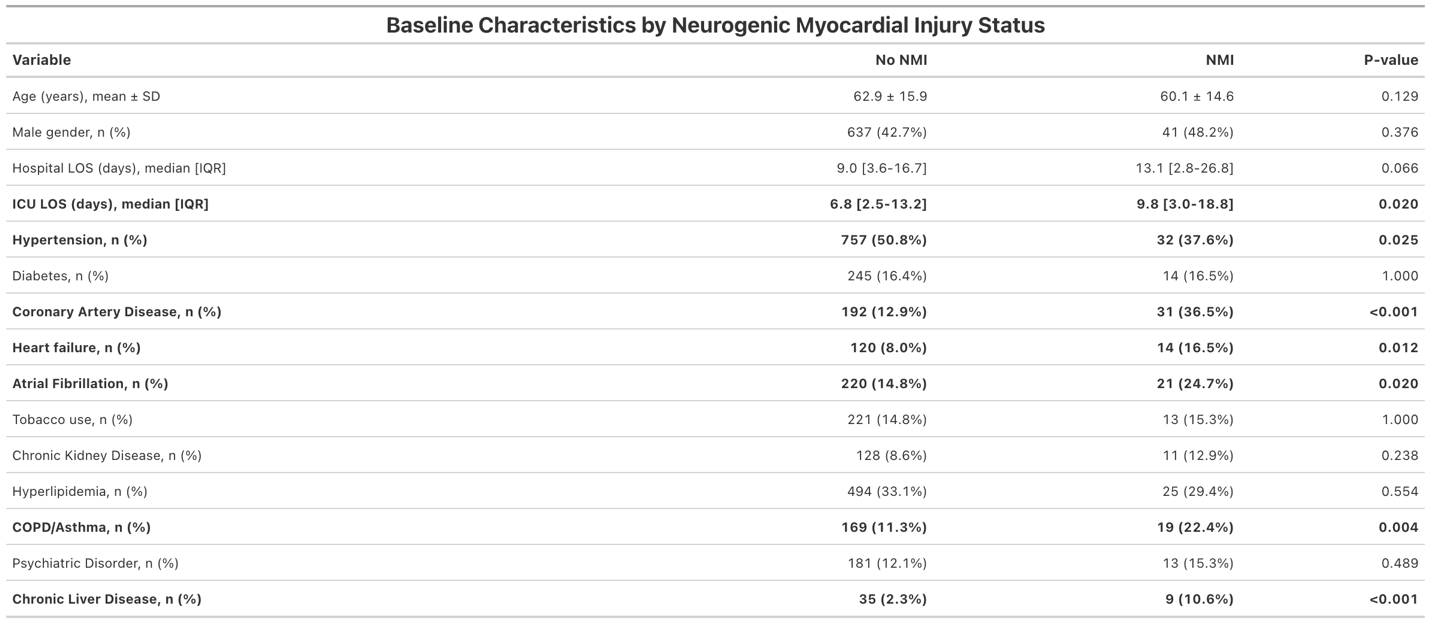


**Table 1.** Baseline Characteristics by Neurogenic Myocardial Injury Status

Values are mean ± standard deviation, median [interquartile range], or n (%), as indicated.

Abbreviations: COPD, chronic obstructive pulmonary disease; ICU, intensive care unit; IQR, interquartile range; LOS, length of stay; SD, standard deviation.
